# Supplementary material for: Superior Pre-Osteoblast Cell Response of Etched Ultrafine-Grained Titanium with a Controlled Crystallographic Orientation
Source: PubMed Central journal article supplement (PMC5339782; doi:10.1038/srep44213), 2017-03-07
Supplement: srep44213-s1.pdf [file srep44213-s1.pdf]

Supplementary Information for

**Superior Pre-Osteoblast Cell Response of Etched Ultrafine-Grained  
Titanium with a Controlled Crystallographic Orientation**

SEUNG MI BAEK<sup>1</sup>, MYEONG HWAN SHIN<sup>1</sup>, JONGUN MOON<sup>1</sup>, HO SANG JUNG<sup>1,2</sup>, SEE AM LEE<sup>1</sup>, WOON-BONG HWANG<sup>3</sup>, JONG TAEK YEOM<sup>2</sup>, SEI KWANG HAHN<sup>1</sup>, HYOUNG SEOP KIM<sup>1,4,\*</sup>

<sup>1</sup>*Department of Materials Science and Engineering, Pohang University of Science and Technology (POSTECH), Pohang, 37673, Republic of Korea*

<sup>2</sup>*Korea Institute of Materials Science, Changwon, 51508, Republic of Korea*

<sup>3</sup>*Department of Mechanical Engineering, Pohang University of Science and Technology (POSTECH), Pohang, 37673, Republic of Korea*

<sup>4</sup>*Center for High Entropy Alloys, Pohang University of Science and Technology (POSTECH), Pohang, 37673, Republic of Korea*

\*Corresponding Author: Hyoungh Seop Kim

E-mail: hskim@postech.ac.kr, Tel. +82 54 279 2150, Fax +82 54 279 2399

## **Supplementary method**

### **Grain size measurement.**

The grain size was measured with electron back-scatter diffraction (EBSD) and transmission electron microscopy (TEM). To investigate the grain sizes of the as-received and annealed specimens, EBSD (OIM4000, EDAX Japan K.K., Japan) was used with field emission scanning electron microscopy (FESEM: XL30S FEG, Philips electron optics B.V., Netherlands). Samples were prepared by mechanical polishing down to 0.25  $\mu\text{m}$  using diamond pastes and electro-etched in an etchant of 6% perchloric acid, 35% butyl alcohol, and 59% methanol by volume. EBSD orientation image maps were acquired on the normal plane of the samples with a total of at least 2000 grains. The grain sizes were determined with orientation image microscopy (OIM) software (TSL OIM analysis 5.2, EDAX Inc., USA). The grain size of the HPT-processed specimen was examined by TEM (JOEL JEM-2200FS, JEOL, USA) on a jet-polished 3 mm disk thin foil.

## Supplementary Figures

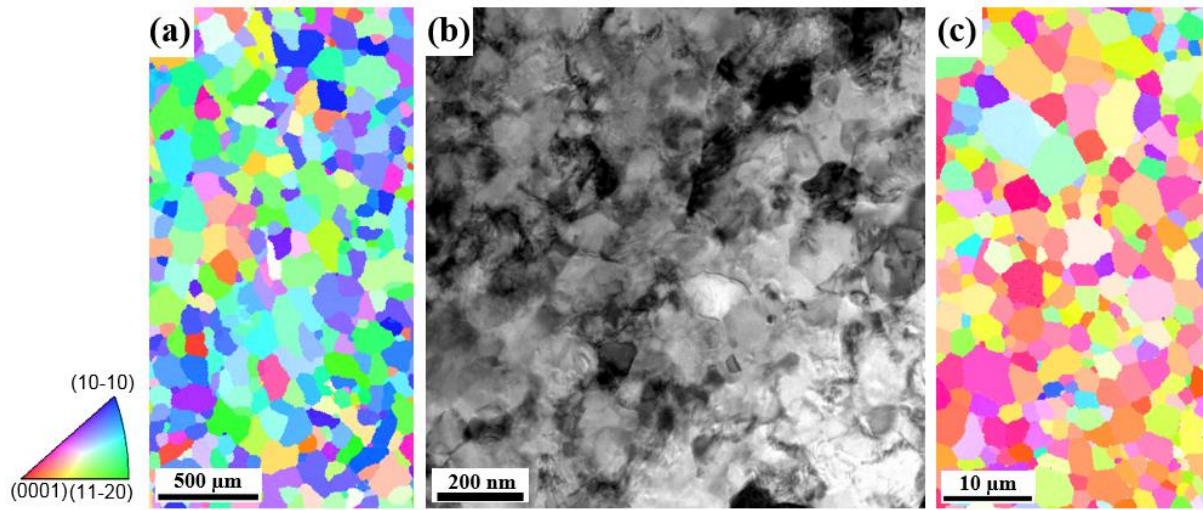

**Figure S1. Microstructures of CP-Ti samples**

EBSD micrographs of (a) the as-received and (c) HPT + annealed samples and (b) STEM micrograph of the HPT-processed sample
